# Supplementary figures and images for: Major Bleeding Events in Hospitalized COVID-19 Patients: A Retrospective Observational Study
Source: MDPI journal article supplement (doi:10.3390/medicina60050814), 2024-05-15

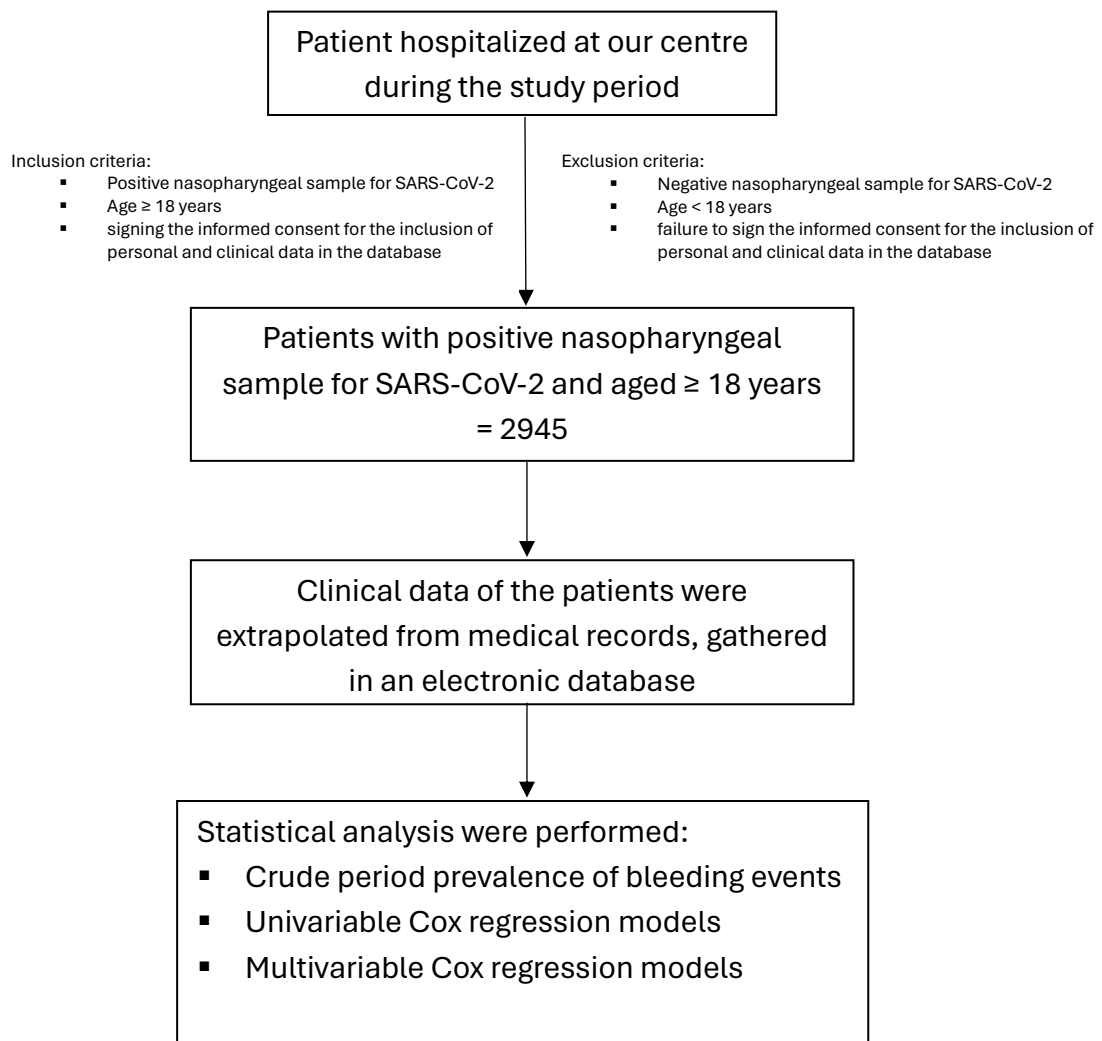

**Supplementary Figure S1.** Flow chart of patients inclusion and data management.

Supplement: s1 [file s1]
